# Supplementary material for: Physician age and outcomes in elderly patients in hospital in the US: observational study
Source: PubMed Central journal article supplement — BMJ. 2017 May 16;357:j1797. doi: 10.1136/bmj.j1797 (PMC5431772; doi:10.1136/bmj.j1797), 2017-05-16
Supplement: tsuy037263.ww1.pdf [file tsuy037263.ww1.pdf]

**Appendix: Supplementary tables [posted as supplied by author]**

**Table A.** ICD-9 (*International Classification of Diseases, 9th Edition*) codes

| Condition                             | ICD-9 codes                                                                                                                                                                                                                                                                                                                                                                                     |
|---------------------------------------|-------------------------------------------------------------------------------------------------------------------------------------------------------------------------------------------------------------------------------------------------------------------------------------------------------------------------------------------------------------------------------------------------|
| Sepsis                                | 0031, 0202, 0223, 0362, 0380, 0381, 03810, 03811, 03812, 03819, 0382, 0383, 03840, 03841, 03842, 03843, 03844, 03849, 0388, 0389, 0545, 449, 77181, 7907, 99591, 99592                                                                                                                                                                                                                          |
| Pneumonia                             | 00322, 0203, 0204, 0205, 0212, 0221, 0310, 0391, 0521, 0551, 0730, 0830, 1124, 1140, 1144, 1145, 11505, 11515, 11595, 1304, 1363, 4800, 4801, 4802, 4803, 4808, 4809, 481, 4820, 4821, 4822, 4823, 48230, 48231, 48232, 48239, 4824, 48240, 48241, 48242, 48249, 4828, 48281, 48282, 48283, 48284, 48289, 4829, 483, 4830, 4831, 4838, 4841, 4843, 4845, 4846, 4847, 4848, 485, 486, 5130, 5171 |
| Congestive heart failure              | 39891, 4280, 4281, 42820, 42821, 42822, 42823, 42830, 42831, 42832, 42833, 42840, 42841, 42842, 42843, 4289                                                                                                                                                                                                                                                                                     |
| Chronic obstructive pulmonary disease | 490, 4910, 4911, 4912, 49120, 49121, 49122, 4918, 4919, 4920, 4928, 494, 4940, 4941, 496                                                                                                                                                                                                                                                                                                        |

**Table B.** Association between physician age and 30-day patient mortality, among general internists

| Physician age                                  | No. of hospitalizations (No. of physicians) | Adjusted 30-day mortality rate (95% CI) | Adjusted odds ratio (95% CI)  | p-value |
|------------------------------------------------|---------------------------------------------|-----------------------------------------|-------------------------------|---------|
| <b>Physician age as a continuous variable</b>  |                                             |                                         |                               |         |
| For every 10 years increase                    | 1,008,194 (31,210)                          |                                         | <b>1.03</b><br>(1.02 to 1.04) | <0.001  |
| <b>Physician age as a categorical variable</b> |                                             |                                         |                               |         |
| <40 years                                      | 392,774 (14,763)                            | <b>11.0%</b><br>(10.9% to 11.1%)        | Reference                     |         |
| 40-49 years                                    | 373,732 (12,614)                            | <b>11.4%</b><br>(11.3% to 11.5%)        | <b>1.05</b><br>(1.03 to 1.07) | <0.001  |
| 50-59 years                                    | 180,546 (6,655)                             | <b>11.5%</b><br>(11.3% to 11.6%)        | <b>1.05</b><br>(1.03 to 1.08) | <0.001  |
| ≥60 years                                      | 61,142 (3,108)                              | <b>11.8%</b><br>(11.5% to 12.2%)        | <b>1.10</b><br>(1.06 to 1.15) | <0.001  |

Adjusted for patient and physician characteristics and hospital fixed effects. Standard errors were clustered at physician level. The total number of physicians varies between the continuous and categorical analyses because some physicians moved to a higher age category during the study period.

\* Estimates should be interpreted as an average odds ratio across all physician age categories.

**Table C.** Association between physician age and 30-day patient mortality, using different rules to attribute patient outcomes to physicians

|                                                     | Physician age                                  | No. of hospitalizations<br>(No. of physicians) | Adjusted 30-day mortality rate<br>(95% CI) | Adjusted odds ratio<br>(95% CI) | p-value |
|-----------------------------------------------------|------------------------------------------------|------------------------------------------------|--------------------------------------------|---------------------------------|---------|
| Physicians billing the largest number of E&M claims | <b>Physician age as a continuous variable</b>  |                                                |                                            |                                 |         |
|                                                     | For every 10 years increase                    | 724,002<br>(18,844)                            |                                            | <b>1.03</b><br>(1.02 to 1.05)   | <0.001  |
|                                                     | <b>Physician age as a categorical variable</b> |                                                |                                            |                                 |         |
|                                                     | <40 years                                      | 305,741<br>(10,166)                            | <b>10.7%</b><br>(10.6% to 10.8%)           | Reference                       |         |
|                                                     | 40-49 years                                    | 274,716<br>(7,991)                             | <b>10.8%</b><br>(10.7% to 11.0%)           | <b>1.02</b><br>(1.00 to 1.04)   | 0.04    |
|                                                     | 50-59 years                                    | 112,218<br>(3,314)                             | <b>11.0%</b><br>(10.8% to 11.2%)           | <b>1.05</b><br>(1.02 to 1.08)   | 0.003   |
|                                                     | ≥60 years                                      | 31,327<br>(1,084)                              | <b>11.8%</b><br>(11.4% to 12.3%)           | <b>1.15</b><br>(1.09 to 1.22)   | <0.001  |
| Physicians billing the first E&M claims             | <b>Physician age as a continuous variable</b>  |                                                |                                            |                                 |         |
|                                                     | For every 10 years increase                    | 788,770<br>(18,946)                            |                                            | <b>1.04</b><br>(1.02 to 1.05)   | <0.001  |
|                                                     | <b>Physician age as a categorical variable</b> |                                                |                                            |                                 |         |
|                                                     | <40 years                                      | 333,641<br>(10,189)                            | <b>10.2%</b><br>(10.1% to 10.3%)           | Reference                       |         |
|                                                     | 40-49 years                                    | 300,161<br>(8,045)                             | <b>10.4%</b><br>(10.3% to 10.5%)           | <b>1.02</b><br>(1.002 to 1.04)  | 0.03    |
|                                                     | 50-59 years                                    | 120,923<br>(3,366)                             | <b>10.7%</b><br>(10.6% to 10.9%)           | <b>1.07</b><br>(1.04 to 1.10)   | <0.001  |
|                                                     | ≥60 years                                      | 34,045<br>(1,120)                              | <b>11.2%</b><br>(10.8% to 11.5%)           | <b>1.12</b><br>(1.07 to 1.18)   | <0.001  |

Adjusted for patient and physician characteristics and hospital fixed effects. Standard errors were clustered at physician level. The total number of physicians varies between the continuous and categorical analyses because some physicians moved to a higher age category during the study period.

\* Estimates should be interpreted as an average odds ratio across all physician age categories.

**Table D.** Association between physician age and 30-day patient mortality, excluding patients with cancer and patients who were discharged to hospice

| Physician age                                  | No. of hospitalizations<br>(No. of physicians) | Adjusted 30-day<br>mortality rate<br>(95% CI) | Adjusted odds ratio<br>(95% CI) | p-value |
|------------------------------------------------|------------------------------------------------|-----------------------------------------------|---------------------------------|---------|
| <b>Physician age as a continuous variable</b>  |                                                |                                               |                                 |         |
| For every 10<br>years increase                 | 653,929<br>(18,775)                            |                                               | <b>1.05</b><br>(1.03 to 1.07)   | <0.001  |
| <b>Physician age as a categorical variable</b> |                                                |                                               |                                 |         |
| <40 years                                      | 274,379<br>(10,137)                            | <b>7.3%</b><br>(7.2% to 7.54%)                | Reference                       |         |
| 40-49 years                                    | 249,526<br>(7,959)                             | <b>7.7%</b><br>(7.6% to 7.8%)                 | <b>1.07</b><br>(1.04 to 1.09)   | <0.001  |
| 50-59 years                                    | 102,798<br>(3,307)                             | <b>7.9%</b><br>(7.7% to 8.0%)                 | <b>1.09</b><br>(1.05 to 1.13)   | <0.001  |
| ≥60 years                                      | 27,226<br>(1,076)                              | <b>8.2%</b><br>(7.8% to 8.6%)                 | <b>1.15</b><br>(1.07 to 1.22)   | <0.001  |

Adjusted for patient and physician characteristics and hospital fixed effects. Standard errors were clustered at physician level. The total number of physicians varies between the continuous and categorical analyses because some physicians moved to a higher age category during the study period.

\* Estimates should be interpreted as an average odds ratio across all physician age categories.

**Table E.** Association between physician age and 30-day patient mortality, restricted to patients aged 65-75 years.

| Physician age                                  | No. of hospitalizations<br>(No. of physicians) | Adjusted 30-day<br>mortality rate<br>(95% CI) | Adjusted odds ratio<br>(95% CI) | p-value |
|------------------------------------------------|------------------------------------------------|-----------------------------------------------|---------------------------------|---------|
| <b>Physician age as a continuous variable</b>  |                                                |                                               |                                 |         |
| For every 10<br>years increase                 | 210,317<br>(17,777)                            |                                               | <b>1.05</b><br>(1.02 to 1.08)   | 0.001   |
| <b>Physician age as a categorical variable</b> |                                                |                                               |                                 |         |
| <40 years                                      | 89,129<br>(9,533)                              | <b>6.9%</b><br>(6.8% to 7.1%)                 | Reference                       |         |
| 40-49 years                                    | 79,474<br>(7,399)                              | <b>7.2%</b><br>(7.1% to 7.4%)                 | <b>1.06</b><br>(1.01 to 1.11)   | 0.02    |
| 50-59 years                                    | 32,926<br>(3,017)                              | <b>7.2%</b><br>(7.0% to 7.5%)                 | <b>1.06</b><br>(0.99 to 1.13)   | 0.07    |
| ≥60 years                                      | 8,788<br>(936)                                 | <b>8.1%</b><br>(7.5% to 8.7%)                 | <b>1.23</b><br>(1.11 to 1.37)   | <0.001  |

Adjusted for patient and physician characteristics and hospital fixed effects. Standard errors were clustered at physician level. The total number of physicians varies between the continuous and categorical analyses because some physicians moved to a higher age category during the study period.

\* Estimates should be interpreted as an average odds ratio across all physician age categories.

**Table F.** Association between physician age and 30-day patient mortality, hospitalists not restricted to general internists (includes hospitalists with subspecialty boards)

| Physician age                                  | No. of hospitalizations (No. of physicians) | Adjusted 30-day mortality rate (95% CI) | Adjusted odds ratio (95% CI)  | p-value |
|------------------------------------------------|---------------------------------------------|-----------------------------------------|-------------------------------|---------|
| <b>Physician age as a continuous variable</b>  |                                             |                                         |                               |         |
| For every 10 years increase                    | 949,313 (26,275)                            |                                         | <b>1.03</b><br>(1.02 to 1.05) | <0.001  |
| <b>Physician age as a categorical variable</b> |                                             |                                         |                               |         |
| <40 years                                      | 378,617 (13,289)                            | <b>11.1%</b><br>(11.0% to 11.2%)        | Reference                     |         |
| 40-49 years                                    | 354,995 (10,903)                            | <b>11.5%</b><br>(11.3% to 11.6%)        | <b>1.05</b><br>(1.03 to 1.07) | <0.001  |
| 50-59 years                                    | 164,467 (5,190)                             | <b>11.6%</b><br>(11.4% to 11.7%)        | <b>1.06</b><br>(1.03 to 1.09) | <0.001  |
| ≥60 years                                      | 51,234 (2,142)                              | <b>11.9%</b><br>(11.6% to 12.3%)        | <b>1.11</b><br>(1.06 to 1.16) | <0.001  |

Adjusted for patient and physician characteristics and hospital fixed effects. Standard errors were clustered at physician level. The total number of physicians varies between the continuous and categorical analyses because some physicians moved to a higher age category during the study period.

\* Estimates should be interpreted as an average odds ratio across all physician age categories.

**Table G.** Association between physician age and 30-day patient mortality, restricting to first admissions for patients with multiple admissions

| Physician age                                  | No. of hospitalizations (No. of physicians) | Adjusted 30-day mortality rate (95% CI) | Adjusted odds ratio (95% CI)  | p-value |
|------------------------------------------------|---------------------------------------------|-----------------------------------------|-------------------------------|---------|
| <b>Physician age as a continuous variable</b>  |                                             |                                         |                               |         |
| For every 10 years increase                    | 529,028 (18,758)                            |                                         | <b>1.05</b><br>(1.03 to 1.07) | <0.001  |
| <b>Physician age as a categorical variable</b> |                                             |                                         |                               |         |
| <40 years                                      | 223,554 (10,121)                            | <b>9.9%</b><br>(9.8% to 10.0%)          | Reference                     |         |
| 40-49 years                                    | 201,127 (7,960)                             | <b>10.3%</b><br>(10.1% to 10.4%)        | <b>1.05</b><br>(1.02 to 1.08) | <0.001  |
| 50-59 years                                    | 82,300 (3,293)                              | <b>10.4%</b><br>(10.1% to 10.6%)        | <b>1.06</b><br>(1.03 to 1.10) | 0.001   |
| ≥60 years                                      | 22,047 (1,064)                              | <b>11.4%</b><br>(10.9% to 11.9%)        | <b>1.21</b><br>(1.14 to 1.30) | <0.001  |

Adjusted for patient and physician characteristics and hospital fixed effects. Standard errors were clustered at physician level. The total number of physicians varies between the continuous and categorical analyses because some physicians moved to a higher age category during the study period.

\* Estimates should be interpreted as an average odds ratio across all physician age categories.

**Table H.** Association between physician age and in-hospital mortality of patients

| Physician age                                  | No. of hospitalizations<br>(No. of physicians) | Adjusted in-hospital<br>mortality rate<br>(95% CI) | Adjusted odds ratio<br>(95% CI) | p-value |
|------------------------------------------------|------------------------------------------------|----------------------------------------------------|---------------------------------|---------|
| <b>Physician age as a continuous variable</b>  |                                                |                                                    |                                 |         |
| For every 10<br>years increase                 | 578,329<br>(18,173)                            |                                                    | <b>1.12</b><br>(1.09 to 1.14)   | 0.001   |
| <b>Physician age as a categorical variable</b> |                                                |                                                    |                                 |         |
| <40 years                                      | 249,201<br>(9,694)                             | <b>3.6%</b><br>(3.5% to 3.6%)                      | Reference                       |         |
| 40-49 years                                    | 217,749<br>(7,075)                             | <b>4.0%</b><br>(3.9% to 4.1%)                      | <b>1.15</b><br>(1.10 to 1.19)   | 0.02    |
| 50-59 years                                    | 88,411<br>(2,866)                              | <b>4.2%</b><br>(4.1% to 4.4%)                      | <b>1.23</b><br>(1.17 to 1.30)   | 0.07    |
| ≥60 years                                      | 22,968<br>(897)                                | <b>4.4%</b><br>(4.1% to 4.8%)                      | <b>1.31</b><br>(1.19 to 1.44)   | <0.001  |

Adjusted for patient and physician characteristics and hospital fixed effects. Standard errors were clustered at physician level. The total number of physicians varies between the continuous and categorical analyses because some physicians moved to a higher age category during the study period.

\* Estimates should be interpreted as an average odds ratio across all physician age categories.

**Table I.** Association between physician age and 60- and 90-day mortality of patients

|                  | Physician age                                  | No. of hospitalizations<br>(No. of physicians) | Adjusted mortality rate<br>(95% CI) | Adjusted odds ratio<br>(95% CI) | p-value |
|------------------|------------------------------------------------|------------------------------------------------|-------------------------------------|---------------------------------|---------|
| 60-day mortality | <b>Physician age as a continuous variable</b>  |                                                |                                     |                                 |         |
|                  | For every 10 years increase                    | 722,797<br>(18,840)                            |                                     | <b>1.04</b><br>(1.03 to 1.05)   | <0.001  |
|                  | <b>Physician age as a categorical variable</b> |                                                |                                     |                                 |         |
|                  | <40 years                                      | 303,670<br>(10,162)                            | <b>15.0%</b><br>(14.8% to 15.1%)    | Reference                       |         |
|                  | 40-49 years                                    | 275,443<br>(8,013)                             | <b>15.4%</b><br>(15.3% to 15.5%)    | <b>1.04</b><br>(1.02 to 1.06)   | <0.001  |
|                  | 50-59 years                                    | 113,378<br>(3,329)                             | <b>15.6%</b><br>(15.4% to 15.8%)    | <b>1.06</b><br>(1.03 to 1.09)   | <0.001  |
|                  | ≥60 years                                      | 30,306<br>(1,085)                              | <b>16.5%</b><br>(16.0% to 17.1%)    | <b>1.16</b><br>(1.10 to 1.22)   | <0.001  |
| 90-day mortality | <b>Physician age as a continuous variable</b>  |                                                |                                     |                                 |         |
|                  | For every 10 years increase                    | 709,135<br>(18,805)                            |                                     | <b>1.04</b><br>(1.03 to 1.05)   | <0.001  |
|                  | <b>Physician age as a categorical variable</b> |                                                |                                     |                                 |         |
|                  | <40 years                                      | 298,440<br>(10,139)                            | <b>17.6%</b><br>(17.5% to 17.8%)    | Reference                       |         |
|                  | 40-49 years                                    | 270,058<br>(7,999)                             | <b>18.0%</b><br>(17.9% to 18.2%)    | <b>1.04</b><br>(1.02 to 1.05)   | <0.001  |
|                  | 50-59 years                                    | 110,985<br>(3,326)                             | <b>18.3%</b><br>(18.1% to 18.6%)    | <b>1.06</b><br>(1.03 to 1.09)   | <0.001  |
|                  | ≥60 years                                      | 29,652<br>(1,080)                              | <b>19.1%</b><br>(18.5% to 19.7%)    | <b>1.13</b><br>(1.08 to 1.19)   | <0.001  |

Adjusted for patient and physician characteristics and hospital fixed effects. Standard errors were clustered at physician level. The total number of physicians varies between the continuous and categorical analyses because some physicians moved to a higher age category during the study period.

\* Estimates should be interpreted as an average odds ratio across all physician age categories.

**Table J.** Association between physician age and 30-day patient mortality, using generalized estimating equations

| Physician age                                  | No. of hospitalizations (No. of hospitals) | Adjusted 30-day mortality rate (95% CI) | Adjusted odds ratio (95% CI)  | p-value |
|------------------------------------------------|--------------------------------------------|-----------------------------------------|-------------------------------|---------|
| <b>Physician age as a continuous variable</b>  |                                            |                                         |                               |         |
| For every 10 years increase                    | 736,549 (2,675)                            |                                         | <b>1.04</b><br>(1.03 to 1.06) | <0.001  |
| <b>Physician age as a categorical variable</b> |                                            |                                         |                               |         |
| <40 years                                      |                                            | <b>10.8%</b><br>(10.7% to 10.9%)        | Reference                     |         |
| 40-49 years                                    | 736,549 (2,675)                            | <b>11.1%</b><br>(11.0% to 11.3%)        | <b>1.04</b><br>(1.02 to 1.06) | <0.001  |
| 50-59 years                                    |                                            | <b>11.3%</b><br>(11.1% to 11.5%)        | <b>1.07</b><br>(1.04 to 1.10) | <0.001  |
| ≥60 years                                      |                                            | <b>12.1%</b><br>(11.6% to 12.4%)        | <b>1.17</b><br>(1.11 to 1.22) | <0.001  |

Adjusted for patient and physician characteristics and hospital fixed effects. We used the independent correlation matrix with observations clustered within hospitals. The number of observations in each physician age category was unavailable because some hospitals were excluded from the sample due to complete or quasi-complete separation.

\* Estimates should be interpreted as an average odds ratio across all physician age categories.

**Table K.** Association between physician age and 30-day patient mortality, by primary condition

|                                       | Physician age | No. of hospitalizations<br>(No. of physicians) | Adjusted 30-day mortality rate<br>(95% CI) | Adjusted odds ratio<br>(95% CI) | p-value |
|---------------------------------------|---------------|------------------------------------------------|--------------------------------------------|---------------------------------|---------|
| Sepsis                                | Continuous    | 71,044<br>(14,742)                             |                                            | <b>1.08</b><br>(1.05 to 1.11)   | <0.001  |
|                                       | <40 years     | 29,944<br>(7,486)                              | <b>22.2%</b><br>(21.7% to 22.7%)           | Reference                       |         |
|                                       | 40-49 years   | 26,989<br>(5,990)                              | <b>22.7%</b><br>(22.2% to 23.2%)           | <b>1.04</b><br>(0.99 to 1.09)   | 0.14    |
|                                       | 50-59 years   | 11,037<br>(2,400)                              | <b>24.2%</b><br>(23.3% to 25.0%)           | <b>1.14</b><br>(1.07 to 1.22)   | <0.001  |
|                                       | ≥60 years     | 3,074<br>(729)                                 | <b>24.9%</b><br>(23.1% to 26.7%)           | <b>1.20</b><br>(1.06 to 1.35)   | 0.004   |
| Pneumonia                             | Continuous    | 48,858<br>(12,776)                             |                                            | <b>1.01</b><br>(0.96 to 1.05)   | 0.74    |
|                                       | <40 years     | 19,881<br>(6,404)                              | <b>11.3%</b><br>(110.9% to 11.8%)          | Reference                       |         |
|                                       | 40-49 years   | 19,005<br>(5,151)                              | <b>11.0%</b><br>(10.6% to 11.5%)           | <b>0.96</b><br>(0.89 to 1.04)   | 0.34    |
|                                       | 50-59 years   | 7,854<br>(2,046)                               | <b>11.4%</b><br>(10.7% to 12.2%)           | <b>1.01</b><br>(0.91 to 1.12)   | 0.82    |
|                                       | ≥60 years     | 2,118<br>(603)                                 | <b>11.3%</b><br>(9.8% to 12.8%)            | <b>1.00</b><br>(0.83 to 1.19)   | 0.96    |
| Congestive heart failure              | Continuous    | 48,601<br>(12,888)                             |                                            | <b>1.10</b><br>(1.05 to 1.16)   | <0.001  |
|                                       | <40 years     | 20,441<br>(6,547)                              | <b>11.8%</b><br>(11.4% to 12.3%)           | Reference                       |         |
|                                       | 40-49 years   | 18,560<br>(5,222)                              | <b>13.3%</b><br>(12.8% to 13.8%)           | <b>1.16</b><br>(1.08 to 1.25)   | <0.001  |
|                                       | 50-59 years   | 7,604<br>(2,041)                               | <b>13.5%</b><br>(12.7% to 14.3%)           | <b>1.18</b><br>(1.08 to 1.30)   | <0.001  |
|                                       | ≥60 years     | 1,996<br>(585)                                 | <b>13.4%</b><br>(11.7% to 15.0%)           | <b>1.17</b><br>(0.99 to 1.38)   | 0.07    |
| Chronic obstructive pulmonary disease | Continuous    | 25,335<br>(8,306)                              |                                            | <b>1.10</b><br>(1.02 to 1.18)   | 0.01    |
|                                       | <40 years     | 10,407<br>(4,069)                              | <b>6.8%</b><br>(6.3% to 7.3%)              | Reference                       |         |
|                                       | 40-49 years   | 9,652<br>(3,338)                               | <b>7.4%</b><br>(6.9% to 7.9%)              | <b>1.11</b><br>(0.98 to 1.27)   | 0.10    |
|                                       | 50-59 years   | 4,145<br>(1,310)                               | <b>7.5%</b><br>(6.7% to 8.4%)              | <b>1.14</b><br>(0.96 to 1.35)   | 0.14    |
|                                       | ≥60 years     | 1,131<br>(361)                                 | <b>9.7%</b><br>(7.7% to 11.7%)             | <b>1.56</b><br>(1.18 to 2.07)   | 0.002   |

The total number of physicians varies between the continuous and categorical analyses because some physicians moved to a higher age category during the study period.

\*Estimates should be interpreted as an average odds ratio across all physician age categories.



**Table L.** Association between years since completion of residency and 30-day patient mortality, using years since completion of residency instead of physician age

| Years in practice                                | No. of hospitalizations<br>(No. of physicians) | Adjusted 30-day mortality rate<br>(95% CI) | Adjusted odds ratio<br>(95% CI) | p-value |
|--------------------------------------------------|------------------------------------------------|--------------------------------------------|---------------------------------|---------|
| <b>Years in practice as continuous variable</b>  |                                                |                                            |                                 |         |
| For every 10 years increase                      | 436,370<br>(13,215)                            |                                            | <b>1.04</b><br>(1.02 to 1.06)   | <0.001  |
| <b>Years in practice as categorical variable</b> |                                                |                                            |                                 |         |
| <40 years                                        | 111,741<br>(6,553)                             | <b>10.7%</b><br>(10.5% to 10.9%)           | Reference                       |         |
| 40-49 years                                      | 141,068<br>(7,638)                             | <b>11.1%</b><br>(10.9% to 11.3%)           | <b>1.05</b><br>(1.02 to 1.09)   | 0.001   |
| 50-59 years                                      | 89,962<br>(4,960)                              | <b>11.0%</b><br>(10.8% to 11.2%)           | <b>1.04</b><br>(1.01 to 1.08)   | 0.03    |
| ≥60 years                                        | 93,599<br>(3,678)                              | <b>11.5%</b><br>(11.3% to 11.7%)           | <b>1.10</b><br>(1.06 to 1.15)   | <0.001  |

Adjusted for patient and physician characteristics and hospital fixed effects. Standard errors were clustered at physician level. The total number of physicians varies between the continuous and categorical analyses because some physicians moved to a higher age category during the study period.

\* Estimates should be interpreted as an average odds ratio across all physician age categories.

**Table M.** Assessing the sensitivity of regression results to unmeasured confounders

| $\Gamma$ | $P_1$ | $P_0$ |      |      |      |      |      |
|----------|-------|-------|------|------|------|------|------|
|          |       | 0.0   | 0.10 | 0.20 | 0.30 | 0.40 | 0.50 |
| 1.30     | 0.0   | 1.17  |      |      |      |      |      |
|          | 0.1   | 1.14  | 1.17 | 1.20 |      |      |      |
|          | 0.2   | 1.10  | 1.14 | 1.17 | 1.20 | 1.24 |      |
|          | 0.3   | 1.07  | 1.11 | 1.14 | 1.17 | 1.20 | 1.23 |
|          | 0.4   | 1.04  | 1.08 | 1.11 | 1.14 | 1.17 | 1.20 |
|          | 0.5   | 1.02  | 1.05 | 1.08 | 1.11 | 1.14 | 1.17 |
| 2.15     | 0.0   | 1.17  |      |      |      |      |      |
|          | 0.1   | 1.05  | 1.17 | 1.29 |      |      |      |
|          | 0.2   | 0.95  | 1.06 | 1.17 | 1.28 | 1.39 |      |
|          | 0.3   | 0.87  | 0.97 | 1.07 | 1.17 | 1.27 | 1.37 |
|          | 0.4   | 0.80  | 0.89 | 0.99 | 1.08 | 1.17 | 1.26 |
|          | 0.5   | 0.74  | 0.83 | 0.91 | 1.00 | 1.08 | 1.17 |

We conducted a formal test to assess the extent to which an unmeasured confounder might explain the difference in patients' 30-day mortality between physicians aged <40 years and physicians aged 60 years or older, which is the adjusted odds ratio [OR] of 1.17.  $P_0$  and  $P_1$  denote the proportion of patients with the unmeasured confounder among patients treated by young physicians and those of old physicians, respectively.  $\Gamma$  represents the strength of association between the unmeasured confounder and mortality. We modeled that patients with the unmeasured confounder have  $\Gamma$  times the odds of death ( $\Gamma > 1$ ) compared with patients without it. In order to use a realistic value for  $\Gamma$ , we selected two comorbidities from the Elixhauser comorbidity conditions that are associated with high risk of death: congestive heart failure (adjusted OR, 1.30) and solid tumor without metastasis (adjusted OR, 2.15). Details about the method can be found elsewhere.<sup>1</sup>

$P_0$  and  $P_1$  denote the proportion of patients with the unmeasured confounder among patients treated by the youngest age group of physicians (<40 years of age) and those of oldest age group ( $\geq 60$  years of age), respectively. The numbers in the table represent the odds ratio that would have been estimated with varying degrees of differential confounding. For example, if there were no confounding or if the confounder affected the two age groups equally, we would obtain the adjusted odds ratio of 1.17, which is the value shown in Table 2 for the 60 years and over group compared to the under 40 years group. Thus, the main diagonals of both matrices are 1.17. For an unmeasured confounder that is as impactful as congestive heart failure (adjusted odds ratio [OR], 1.30), even a 50 percentage point difference in the prevalence of the unmeasured confounder between patients of young and old physicians (0% vs 50%) cannot fully explain the observed difference in patient mortality since the adjusted odds ratio would still be 1.02. If the effect of the unmeasured confounder is greater, for example if it is as influential as a solid tumor without metastasis (adjusted OR, 2.15), then a 10 percentage point difference in the prevalence of the unmeasured confounder (e.g., 0 vs 0.1) would have resulted in an estimated adjusted odds ratio of 1.05. In other words, even this difference with a strong confounder cannot fully explain the observed difference between the oldest and youngest physician groups in patient mortality. Given that the observed difference in prevalence of comorbidities between groups was < 2% across all conditions included in the Elixhauser comorbidity index, it seems highly unlikely that the prevalence of the unmeasured strong confounder would differ by more than 10 percentage points across physicians of varying age.

<sup>1</sup> Lin DY, Psaty BM, Kronmal RA. Assessing the sensitivity of regression results to unmeasured confounders in observational studies. *Biometrics*. 1998;54(3):948-63.

**Table N.** Cost analysis using different model specifications

|                                             | Physician age      | No. of hospitalizations<br>(No. of physicians) | Adjusted cost of care<br>(95% CI)   | Adjusted difference**<br>(95% CI) | P-value |
|---------------------------------------------|--------------------|------------------------------------------------|-------------------------------------|-----------------------------------|---------|
| <b>Negative binomial distribution (GLM)</b> |                    |                                                |                                     |                                   |         |
| Continuous*                                 | For every 10 years | 780,197<br>(18,956)                            |                                     | <b>+2.4%</b><br>(+2.0% to +2.8%)  | <0.001  |
| Categorical                                 | <40 years          | 327,707<br>(10,211)                            | <b>\$1008</b><br>(\$1004 to \$1012) | Reference                         |         |
|                                             | 40-49 years        | 296,680<br>(8,071)                             | <b>\$1027</b><br>(\$1022 to \$1032) | <b>+1.8%</b><br>(+1.3% to +2.4%)  | <0.001  |
|                                             | 50-59 years        | 122,758<br>(3,364)                             | <b>\$1056</b><br>(\$1048 to \$1064) | <b>+4.7%</b><br>(+3.8% to +5.6%)  | <0.001  |
|                                             | ≥60 years          | 33,052<br>(1,111)                              | <b>\$1071</b><br>(\$1055 to \$1088) | <b>+6.3%</b><br>(+4.5% to +8.0%)  | <0.001  |
| <b>Poisson distribution (GLM)</b>           |                    |                                                |                                     |                                   |         |
| Continuous*                                 | For every 10 years | 780,197<br>(18,956)                            |                                     | <b>+3.0%</b><br>(+2.5% to +3.4%)  | <0.001  |
| Categorical                                 | <40 years          | 327,707<br>(10,211)                            | <b>\$1008</b><br>(\$1004 to \$1012) | Reference                         |         |
|                                             | 40-49 years        | 296,680<br>(8,071)                             | <b>\$1032</b><br>(\$1027 to \$1038) | <b>+2.4%</b><br>(+1.7% to +3.1%)  | <0.001  |
|                                             | 50-59 years        | 122,758<br>(3,364)                             | <b>\$1065</b><br>(\$1056 to \$1074) | <b>+5.7%</b><br>(+4.7% to +6.7%)  | <0.001  |
|                                             | ≥60 years          | 33,052<br>(1,111)                              | <b>\$1083</b><br>(\$1063 to \$1103) | <b>+7.4%</b><br>(+5.4% to +9.5%)  | <0.001  |
| <b>OLS model after excluding outliers</b>   |                    |                                                |                                     |                                   |         |
| Continuous*                                 | For every 10 years | 780,197<br>(18,956)                            |                                     | <b>+\$28</b><br>(+\$24 to +\$32)  | <0.001  |
| Categorical                                 | <40 years          | 327,707<br>(10,211)                            | <b>\$988</b><br>(\$984 to \$992)    | Reference                         |         |
|                                             | 40-49 years        | 296,680<br>(8,071)                             | <b>\$1011</b><br>(\$1006 to \$1016) | <b>+\$23</b><br>(+\$16 to +\$29)  | <0.001  |
|                                             | 50-59 years        | 122,758<br>(3,364)                             | <b>\$1042</b><br>(\$1033 to \$1050) | <b>+\$53</b><br>(+\$44 to +\$63)  | <0.001  |
|                                             | ≥60 years          | 33,052<br>(1,111)                              | <b>\$1058</b><br>(\$1041 to \$1077) | <b>+\$69</b><br>(+\$52 to +\$87)  | <0.001  |

Adjusted for patient and physician characteristics and hospital fixed effects. Standard errors were clustered at physician level. The total number of physicians varies between the continuous and categorical analyses because some physicians moved to a higher age category during the study period.

Abbreviations: GLM, generalized linear model; OLS, ordinary least square

\* Estimates should be interpreted as an average odds ratio across all physician age categories.

\*\*Adjusted differences are presented as percent changes for GLMs and absolute differences in cost for OLS.

**Table O.** Association between physician age and 30-day patient mortality (**Part 1**) and readmissions (**Part 2**), among emergency and elective admissions

|                                        | Physician age                                  | No. of hospitalizations (No. of physicians) | Adjusted 30-day mortality rate (95% CI) | Adjusted risk difference (95% CI) | p-value |
|----------------------------------------|------------------------------------------------|---------------------------------------------|-----------------------------------------|-----------------------------------|---------|
| <b>Part 1. 30-day mortality rate</b>   |                                                |                                             |                                         |                                   |         |
| Emergency admissions                   | Physician age as a continuous variable         |                                             |                                         |                                   |         |
|                                        | For every 10 years increase                    | 640,861 (18,472)                            |                                         | <b>+0.4%</b> (+0.3% to +0.5%)     | <0.001  |
|                                        | Physician age as a categorical variable        |                                             |                                         |                                   |         |
|                                        | <40 years                                      | 269,385 (9,939)                             | <b>10.8%</b> (10.7% to 11.0%)           | Reference                         |         |
|                                        | 40-49 years                                    | 245,138 (7,799)                             | <b>11.2%</b> (11.1% to 11.3%)           | <b>+0.4%</b> (+0.2% to +0.6%)     | <0.001  |
|                                        | 50-59 years                                    | 99,857 (3,231)                              | <b>11.4%</b> (11.1% to 11.6%)           | <b>+0.5%</b> (+0.2% to +0.8%)     | <0.001  |
| Elective admissions                    | Physician age as a continuous variable         |                                             |                                         |                                   |         |
|                                        | For every 10 years increase                    | 26,137 (7,978)                              |                                         | <b>+0.4%</b> (-0.1% to +0.9%)     | 0.14    |
|                                        | Physician age as a categorical variable        |                                             |                                         |                                   |         |
|                                        | <40 years                                      | 9,987 (3,750)                               | <b>9.4%</b> (8.8% to 10.0%)             | Reference                         |         |
|                                        | 40-49 years                                    | 9,759 (3,083)                               | <b>9.9%</b> (9.3% to 10.5%)             | <b>+0.5%</b> (-0.4% to +1.4%)     | 0.28    |
|                                        | ≥50 years                                      | 6,391 (1,638)                               | <b>10.7%</b> (9.8% to 11.5%)            | <b>+1.2%</b> (+0.1% to +2.4%)     | 0.03    |
| <b>Part 2. 30-day readmission rate</b> |                                                |                                             |                                         |                                   |         |
| Emergency admissions                   | Physician age as a continuous variable         |                                             |                                         |                                   |         |
|                                        | For every 10 years increase                    | 618,378 (18,433)                            |                                         | <b>+0.02%</b> (-0.1% to +0.1%)    | 0.74    |
|                                        | Physician age as a categorical variable, years |                                             |                                         |                                   |         |
|                                        | <40 years                                      | 261,692 (9,918)                             | <b>15.7%</b> (15.5% to 15.8%)           | Reference                         |         |
|                                        | 40-49 years                                    | 235,898 (7,789)                             | <b>15.7%</b> (15.6% to 15.9%)           | <b>+0.02%</b> (-0.2% to +0.2%)    | 0.84    |
|                                        | 50-59 years                                    | 95,647 (3,214)                              | <b>15.7%</b> (15.4% to 15.9%)           | <b>-0.02%</b> (-0.3% to +0.3%)    | 0.90    |
| Elective admissions                    | Physician age as a continuous variable         |                                             |                                         |                                   |         |
|                                        | For every 10 years increase                    | 27,248 (8,139)                              |                                         | <b>+0.4%</b> (-0.2% to +1.0%)     | 0.16    |
|                                        | Physician age as a categorical variable        |                                             |                                         |                                   |         |
|                                        | <40 years                                      | 10,568 (3,842)                              | <b>15.5%</b> (14.8% to 16.2%)           | Reference                         |         |
|                                        | 40-49 years                                    | 10,220 (3,157)                              | <b>15.9%</b> (15.2% to 16.6%)           | <b>+0.4%</b> (-0.7% to +1.5%)     | 0.49    |
|                                        | ≥50 years                                      | 6,460 (1,652)                               | <b>16.4%</b> (15.4% to 17.4%)           | <b>+0.9%</b> (-0.5% to +2.3%)     | 0.21    |

Non-elective admissions are defined as either emergency admissions or urgent admissions. The above analysis focused on emergency admissions and elective admissions, as noted. Among elective admissions, those with physician age ≥50 years old were categorized into a single group due to the small sample size of elective admissions. Multivariable linear probability models were used instead of logistic regression models.

**Table P.** Association between physician age and 30-day patient mortality, among patients aged 20-64 years

| Physician age                                         | No. of hospitalizations<br>(No. of physicians) | Adjusted 30-day mortality rate<br>(95% CI) | Adjusted risk difference<br>(95% CI) | p-value |
|-------------------------------------------------------|------------------------------------------------|--------------------------------------------|--------------------------------------|---------|
| <b>Physician age as a continuous variable</b>         |                                                |                                            |                                      |         |
| For every 10 years increase                           | 154,792<br>(17,717)                            |                                            | <b>+0.2%</b><br>(+0.07% to +0.3%)    | 0.002   |
| <b>Physician age as a categorical variable, years</b> |                                                |                                            |                                      |         |
| <40 years                                             | 66,911<br>(9,405)                              | <b>3.7%</b><br>(3.5% to 3.8%)              | Reference                            |         |
| 40-49 years                                           | 57,323<br>(7,272)                              | <b>3.9%</b><br>(3.7% to 4.0%)              | <b>+0.2%</b><br>(-0.04% to +0.4%)    | 0.12    |
| ≥50 years                                             | 30,558<br>(3,602)                              | <b>4.0%</b><br>(3.7% to 4.2%)              | <b>+0.3%</b><br>(+0.0% to +0.6%)     | 0.049   |

Patients aged 20-64 years were eligible for Medicare through disability and are therefore not reflective of the overall US population aged 20-64 years. This analysis was conducted to explore whether the relationship between physician age and patient mortality observed in the Medicare population aged ≥65 years might hold in a younger hospitalized population as well. Hospitalizations for which physicians were aged ≥50 years old were categorized into a single group due to the smaller sample size of these admissions. Multivariable linear probability models were used instead of logistic regression models.
